# Supplementary material
Source: HighWire-hosted journal article supplement (https://bmjopen.bmj.com/content/12/11/e066681)
Supplement: inline-supplementary-material-2 [file inline-supplementary-material-2.pdf]

**Appendix 2: TDF Domains and Their Definitions**

| Domain                                    | Definition                                                                                                                                                                               |
|-------------------------------------------|------------------------------------------------------------------------------------------------------------------------------------------------------------------------------------------|
| Knowledge                                 | An awareness of the existence of something.                                                                                                                                              |
| Skills                                    | An ability or proficiency acquired through practice.                                                                                                                                     |
| Social/professional role and identity     | A coherent set of behaviours and displayed personal qualities of an individual in a social or work setting.                                                                              |
| Beliefs about capabilities                | Acceptance of the truth, reality, or validity about an ability, talent, or facility that a person can put to constructive use.                                                           |
| Optimism                                  | The confidence that things will happen for the best or that desired goals will be attained.                                                                                              |
| Beliefs about consequences                | Acceptance of the truth, reality or validity about outcomes of a behaviour in a given situation.                                                                                         |
| Reinforcement                             | Increasing the probability of a response by arranging a dependent relationship, or contingency, between the response and a given stimulus.                                               |
| Intentions                                | A conscious decision to perform a behaviour or a resolve to act in a certain way.                                                                                                        |
| Goals                                     | Mental representations of outcomes or end states that an individual wants to achieve.                                                                                                    |
| Memory, attention, and decision processes | The ability to retain information, focus selectively on aspects of the environment and choose between two or more alternatives.                                                          |
| Environmental context and resources       | Any circumstance of a person's situation or environment that discourages or encourages the development of skills and abilities, independence, social competence, and adaptive behaviour. |
| Social influences                         | Those interpersonal processes that can cause individuals to change their thoughts, feelings, or behaviours.                                                                              |
| Emotion                                   | A complex reaction pattern, involving experiential, behavioural, and physiological elements, by which the individual attempts to deal with a personally significant matter or event.     |
| Behavioural regulation                    | Anything aimed at managing or changing objectively observed or measured actions.                                                                                                         |

\* Reproduced from [6]
