# Supplementary material
Source: HighWire-hosted journal article supplement (https://bmjopen.bmj.com/content/12/11/e066681)
Supplement: inline-supplementary-material-7 [file inline-supplementary-material-7.pdf]

## Appendix 7: Screening Form Template

### Screening Form Example – Phase 1: Title and Abstract Screening

|                                                                                                                                                                                                                                                       |                                                                                                                                                                                                                                                                                                                                                                                                                                                     |
|-------------------------------------------------------------------------------------------------------------------------------------------------------------------------------------------------------------------------------------------------------|-----------------------------------------------------------------------------------------------------------------------------------------------------------------------------------------------------------------------------------------------------------------------------------------------------------------------------------------------------------------------------------------------------------------------------------------------------|
| Population:                                                                                                                                                                                                                                           |                                                                                                                                                                                                                                                                                                                                                                                                                                                     |
| <b>INCLUDE</b>                                                                                                                                                                                                                                        | <b>EXCLUDE</b>                                                                                                                                                                                                                                                                                                                                                                                                                                      |
| Family physicians discussing URTIs as defined by the Choosing Wisely Canada Guidelines: <ul style="list-style-type: none"> <li>- Otitis Media</li> <li>- Pharyngitis</li> <li>- Sinusitis</li> <li>- Bronchitis</li> <li>- The common cold</li> </ul> | Any other healthcare professional that can prescribe antibiotics (e.g., nurse practitioners, pharmacists, physicians of other specializations). If the findings contain a mixture of healthcare professionals, we will exclude the study if the FP results cannot be separately extracted or if >25% of the sample contains non-family physicians, as the data will then be considered unrepresentative. If uncertain, include for full-text review |

|                                                                                                                                 |                                                                                                                                                                                                                                                                                                    |
|---------------------------------------------------------------------------------------------------------------------------------|----------------------------------------------------------------------------------------------------------------------------------------------------------------------------------------------------------------------------------------------------------------------------------------------------|
| Phenomenon of Interest:                                                                                                         |                                                                                                                                                                                                                                                                                                    |
| <b>INCLUDE</b>                                                                                                                  | <b>EXCLUDE</b>                                                                                                                                                                                                                                                                                     |
| Barriers and enablers for family physicians for managing URTIs following evidence-based prescribing guidelines for antibiotics. | Report physicians' perspectives and experiences for any other infection/condition, and the barriers related to URTIs and related conditions defined by Choosing Wisely Guidelines for Canada cannot be extracted from the other included conditions.<br>If uncertain, include for full-text review |

|                                                          |                                                                                                                                                                                               |
|----------------------------------------------------------|-----------------------------------------------------------------------------------------------------------------------------------------------------------------------------------------------|
| Context:                                                 |                                                                                                                                                                                               |
| <b>INCLUDE</b>                                           | <b>EXCLUDE</b>                                                                                                                                                                                |
| Patients of any age with URTIs in primary care settings. | <ul style="list-style-type: none"> <li>- Patients with URTIs or any other infection or condition in hospital, outpatient (outside of primary care clinics) or ambulatory settings.</li> </ul> |

|  |                                            |
|--|--------------------------------------------|
|  | If uncertain, include for full-text review |
|--|--------------------------------------------|

|                                                                                                                                                                                                                           |                                                                                                                                                                                                                                                                                                                                                                                                                         |
|---------------------------------------------------------------------------------------------------------------------------------------------------------------------------------------------------------------------------|-------------------------------------------------------------------------------------------------------------------------------------------------------------------------------------------------------------------------------------------------------------------------------------------------------------------------------------------------------------------------------------------------------------------------|
| Study Design:                                                                                                                                                                                                             |                                                                                                                                                                                                                                                                                                                                                                                                                         |
| <b>INCLUDE</b>                                                                                                                                                                                                            | <b>EXCLUDE</b>                                                                                                                                                                                                                                                                                                                                                                                                          |
| Primary qualitative studies (i.e. no reviews) and mixed-method studies if sufficient qualitative data are provided (e.g. separate qualitative data analysis). Studies that collected data via focus groups or interviews. | Single-case studies, quantitative studies, interventional studies, survey studies or studies that summarize the results of an original study. These studies do not contain enough information to conduct our analysis.<br>Exclude if:<br><ul style="list-style-type: none"> <li>- Single-case studies, quantitative studies, interventional studies, or studies that summarize results of an original study.</li> </ul> |
|                                                                                                                                                                                                                           | If uncertain, include for full-text review                                                                                                                                                                                                                                                                                                                                                                              |

|                                |                                                    |
|--------------------------------|----------------------------------------------------|
| Publication Type:              |                                                    |
| <b>INCLUDE</b>                 | <b>EXCLUDE</b>                                     |
| Published, full-text available | Full-text unavailable, unpublished/grey literature |
|                                | If uncertain, include for full-text review         |

### Screening Form Example – Phase 2: Full Text Screening

#### General instructions:

- The order of these reasons for exclusion matches the order in the flowchart
- I've arranged the list in order of when we're likely to figure out the reasons for exclusion, e.g. publication type may be the first reason for exclusion we see, so chose that.
- Look and choose the reason for exclusion as soon as you spot it **in the order below**. At this stage, conflicts can arise not only for conflicting votes on including or excluding a study, e.g.

if I choose language as the reason for exclusion for study X, and someone else chooses publication type for reason for exclusion, this will be marked as a conflict.

- An article can have more than one reason for exclusion, but we are going to go in this specific order to try to minimize conflicts.
- For those articles that are incomplete, I will contact authors to try to get all the necessary information.

|                                |                                                   |
|--------------------------------|---------------------------------------------------|
| Publication Type:              |                                                   |
| INCLUDE                        | EXCLUDE                                           |
| Peer-reviewed journal articles | Book chapters, reviews, summaries, opinion pieces |

|                                                                                                                                                                            |                                                                                                                                                                                            |
|----------------------------------------------------------------------------------------------------------------------------------------------------------------------------|--------------------------------------------------------------------------------------------------------------------------------------------------------------------------------------------|
| Study Design:                                                                                                                                                              |                                                                                                                                                                                            |
| INCLUDE                                                                                                                                                                    | EXCLUDE                                                                                                                                                                                    |
| All types of primary qualitative studies (i.e. no reviews) and mixed method studies if sufficient qualitative data are provided (e.g. separate qualitative data analysis). | Exclude if: <ul style="list-style-type: none"> <li>- Single-case studies, quantitative studies, interventional studies, or studies that summarize results of an original study.</li> </ul> |

|                                                         |                                                                                                                                                                                                                                                                                                                                                      |
|---------------------------------------------------------|------------------------------------------------------------------------------------------------------------------------------------------------------------------------------------------------------------------------------------------------------------------------------------------------------------------------------------------------------|
| Context:                                                |                                                                                                                                                                                                                                                                                                                                                      |
| INCLUDE                                                 | EXCLUDE                                                                                                                                                                                                                                                                                                                                              |
| Patients of any age with URIs in primary care settings. | Exclude articles that <b>ONLY</b> report about: <ul style="list-style-type: none"> <li>- Patients with URIs or any other infection or condition in hospital, outpatient (outside of primary care clinics) or ambulatory settings.</li> </ul> <p>If results for primary care settings only cannot be differentiated or extracted, <b>exclude.</b></p> |

|             |
|-------------|
| Population: |
|-------------|

| INCLUDE                                                                                                                                                                                                                   | EXCLUDE                                                                                                                                                                                                                                                                                                                                                  |
|---------------------------------------------------------------------------------------------------------------------------------------------------------------------------------------------------------------------------|----------------------------------------------------------------------------------------------------------------------------------------------------------------------------------------------------------------------------------------------------------------------------------------------------------------------------------------------------------|
| Any URTI outlined in the Choosing Wisely Canada Guidelines: <ul style="list-style-type: none"> <li>- Otitis Media</li> <li>- Pharyngitis</li> <li>- Sinusitis</li> <li>- The common cold</li> <li>- Bronchitis</li> </ul> | Exclude articles that <b><u>ONLY</u></b> report about: <ul style="list-style-type: none"> <li>- Any other illness for which an antibiotic may be prescribed (e.g., lower respiratory infections, surgical site infections, infections of teeth/mouth)</li> </ul> If results for URTIs only cannot be differentiated or extracted, <b><u>exclude.</u></b> |

| Phenomenon of Interest:                              |                                                                                                                                                                                                                                                                                                                                                                |
|------------------------------------------------------|----------------------------------------------------------------------------------------------------------------------------------------------------------------------------------------------------------------------------------------------------------------------------------------------------------------------------------------------------------------|
| INCLUDE                                              | EXCLUDE                                                                                                                                                                                                                                                                                                                                                        |
| Family physicians prescribing antibiotics for URTIs. | Exclude articles that <b><u>ONLY</u></b> report about: <ul style="list-style-type: none"> <li>- Any other healthcare professional that can prescribe antibiotics (e.g., nurse practitioners, pharmacists, physicians of other specializations).</li> </ul> If results for family physicians only cannot be differentiated or extracted, <b><u>exclude.</u></b> |

\* Screening form adapted from: Screening for studies in systematic, scoping, and other knowledge syntheses: strategies for improvement. Prepared by, Ayala, AP. Last modified April 28, 2020. Gerstein Science Information Centre
