# Supplementary material
Source: HighWire-hosted journal article supplement (https://bmjopen.bmj.com/content/12/11/e066681)
Supplement: inline-supplementary-material-8 [file inline-supplementary-material-8.pdf]

### **Appendix 8: Assessment of Reporting Criteria According to the Guidance from CASP and COREQ**

| Reporting Criteria                             | Study 1 | Study 2 | Study 3 | Study 4<br>etc. |
|------------------------------------------------|---------|---------|---------|-----------------|
| <b>1. Aim</b>                                  |         |         |         |                 |
| Aim explicitly stated and relevant             |         |         |         |                 |
| <b>2. Qualitative Approach</b>                 |         |         |         |                 |
| Design aligned to aim                          |         |         |         |                 |
| Theoretical framework reported                 |         |         |         |                 |
| <b>3. Design</b>                               |         |         |         |                 |
| Design aligned to aims                         |         |         |         |                 |
| Design appropriately justified                 |         |         |         |                 |
| <b>4. Recruitment</b>                          |         |         |         |                 |
| A priori participant selection criteria        |         |         |         |                 |
| Recruitment strategy explained for replication |         |         |         |                 |
| Purposive sampling used                        |         |         |         |                 |
| <b>5. Data Collection</b>                      |         |         |         |                 |
| Data collection explicit, enabling replication |         |         |         |                 |
| Research setting identified                    |         |         |         |                 |
| Focus group, interview, survey described       |         |         |         |                 |
| Data recorded and transcribed                  |         |         |         |                 |
| Field notes taken                              |         |         |         |                 |
| Data saturation reported                       |         |         |         |                 |
| <b>6. Researcher-participant relationship</b>  |         |         |         |                 |
| Interviewer level of influence of described    |         |         |         |                 |
| Interviewer identified and described           |         |         |         |                 |
| <b>7. Ethical Issues</b>                       |         |         |         |                 |
| Ethics committee approval obtained             |         |         |         |                 |
| Explanation of the study given                 |         |         |         |                 |
| Informed consent obtained                      |         |         |         |                 |
| Anonymous transcripts used                     |         |         |         |                 |
| Confidentiality described                      |         |         |         |                 |
| <b>8. Analysis</b>                             |         |         |         |                 |
| Type (thematic, content)                       |         |         |         |                 |
| Explicit steps of analysis process             |         |         |         |                 |
| 2 researchers performed analysis               |         |         |         |                 |
| Quotations to support findings                 |         |         |         |                 |
| Contrary observations                          |         |         |         |                 |
| <b>9. Findings</b>                             |         |         |         |                 |
| Explicit statement of findings                 |         |         |         |                 |
| Credibility                                    |         |         |         |                 |
| Discussion linked to aims/literature           |         |         |         |                 |
| Strengths and limitations                      |         |         |         |                 |

|                                    |  |  |  |  |
|------------------------------------|--|--|--|--|
| 10. Value                          |  |  |  |  |
| Contribution to knowledge base     |  |  |  |  |
| Transferability (generalizability) |  |  |  |  |
| Recommendations for practices      |  |  |  |  |
| Recommendations for research       |  |  |  |  |

Reproduced from: Hall AM, Scurry SR, Pike AE, Albury C, Richmond HL, Matthews J, et al. Physician-reported barriers to using evidence-based recommendations for low back pain in clinical practice: a systematic review and synthesis of qualitative studies using the Theoretical Domains Framework. *Implement Sci.* 2019;14:49.
